# Supplementary material
Source: publisher figshare collection journal article supplement (https://acs.figshare.com/ndownloader/files/12467990)

## Supporting Information

### 25S-Adamantyl-23-yne-26,27-dinor-1 $\alpha$ ,25-dihydroxyvitamin D<sub>3</sub>: Synthesis, Tissue Selective Biological Activities and X-ray Crystal Structural Analysis of Its Vitamin D Receptor Complex

Rocio Otero, Michiyasu Ishizawa, Nobutaka Numoto, Teikichi Ikura, Nobutoshi Ito, Hiroaki Tokiwa, Antonio Mourino, Makoto Makishima, and Sachiko Yamada

#### A table of contents

Figure S1A. Uptake of 1,25(OH)<sub>2</sub>D<sub>3</sub> (**1**), ADRO1 (**4b**), ADRO2 (**4a**) and ADTK1 (**2b**) by MG63 cells. (page S2)

Figure S1B. Stability of 1,25(OH)<sub>2</sub>D<sub>3</sub> (**1**), ADRO1 (**4b**), ADRO2(**4a**) and ADTK1 (**2b**) in MG63 cells. (page S3)

Figure S2. Overall crystal structures of ternary rVDR-LBD/25R-isomer (**4a**) /DRIP205 co-activator complex. (page S4)

Figure S3. Van der Waals interactions (<4 Å, magenta lines) of **4a** (atom-type colors with green carbon) with VDR residues (atom-type colors). (page S5)

Figure S4. Electron density maps at the helix 11 region of VDR/ligand complexes. (page S6-S8)

Figure S5. Surface structure of VDR-LBD/19-nor-2-methylene vitamin D derivative (**2b**) complex with hydrogen-bond donor (green)/acceptor (magenta) colors. (page S9)

Table S1. X-ray data collection and refinement statistics for rVDR-LBD/DRIP205/**4a** and **4b**. (page S10)

<sup>1</sup>H and <sup>13</sup>C NMR spectra of **4a**, **4b**, **5a**, **5b**, **6**, **8**, **13**, **14**, **15**, **16**, **17** and **18** (page S11-S22)

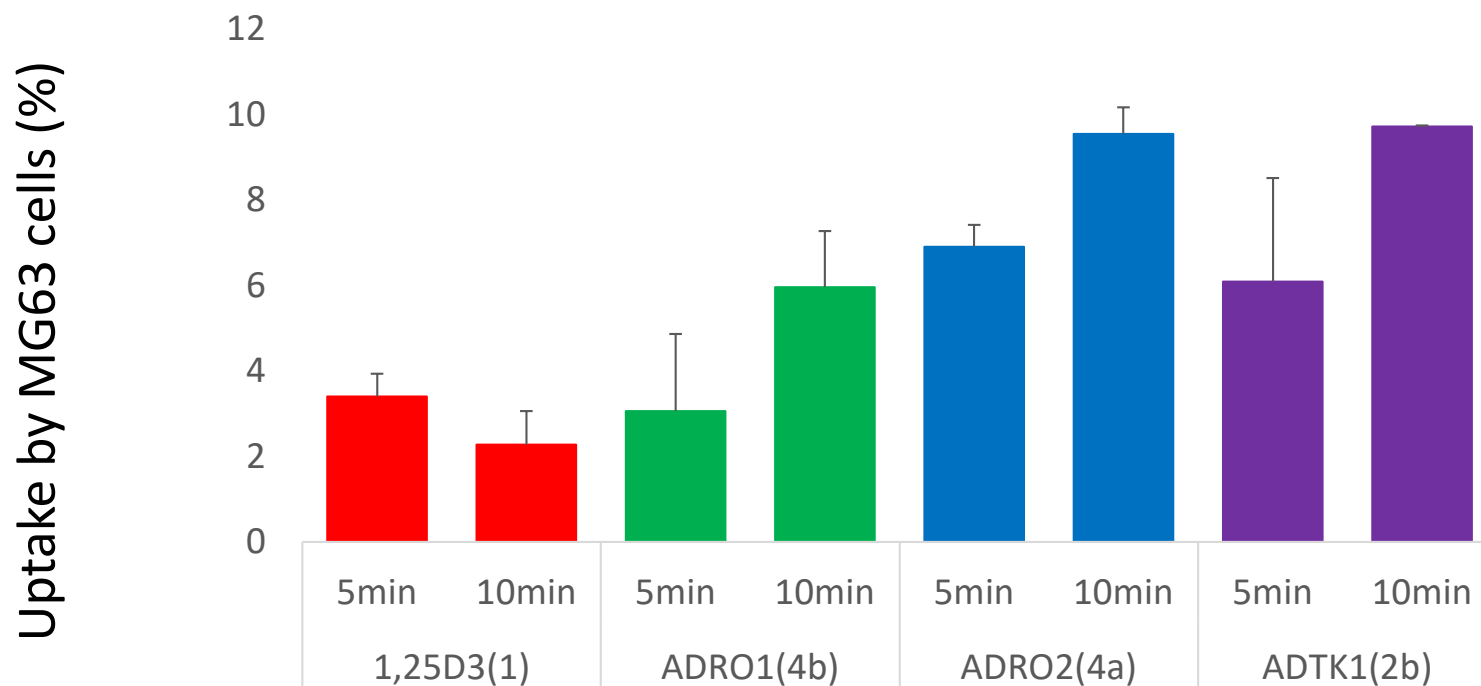

Figure S1A. Uptake of 1,25(OH)<sub>2</sub>D<sub>3</sub> (**1**), ADRO1 (**4b**), ADRO2 (**4a**) and ADTK1 (**2b**) by MG63 cells.

MG63 cells plated in 35-mm dish at a density  $2 \times 10^5$  cells/well ( $2.5 \times 10^4$  cells/cm<sup>2</sup>) were incubated with 1  $\mu$ M of each compound for 5 min or 10 min. The cells and medium were extracted separately by chloroform/methanol (3:1, v/v). The extracts were analyzed by HPLC: Column, InertSustain C18 (5  $\mu$ m; 4.6 mm  $\times$  250 mm) (GL Sciences Inc., Tokyo, Japan); mobile phase, linear gradient of 20–100% acetonitrile/water; UV detection, 265 nm for 1,25(OH)<sub>2</sub>D<sub>3</sub> (**1**), ADRO1 (**4b**), ADRO2 (**4a**) and 250 nm for ADTK1 (**2b**). All values represent the means and error bars are standard deviations derived from triplicate assays.

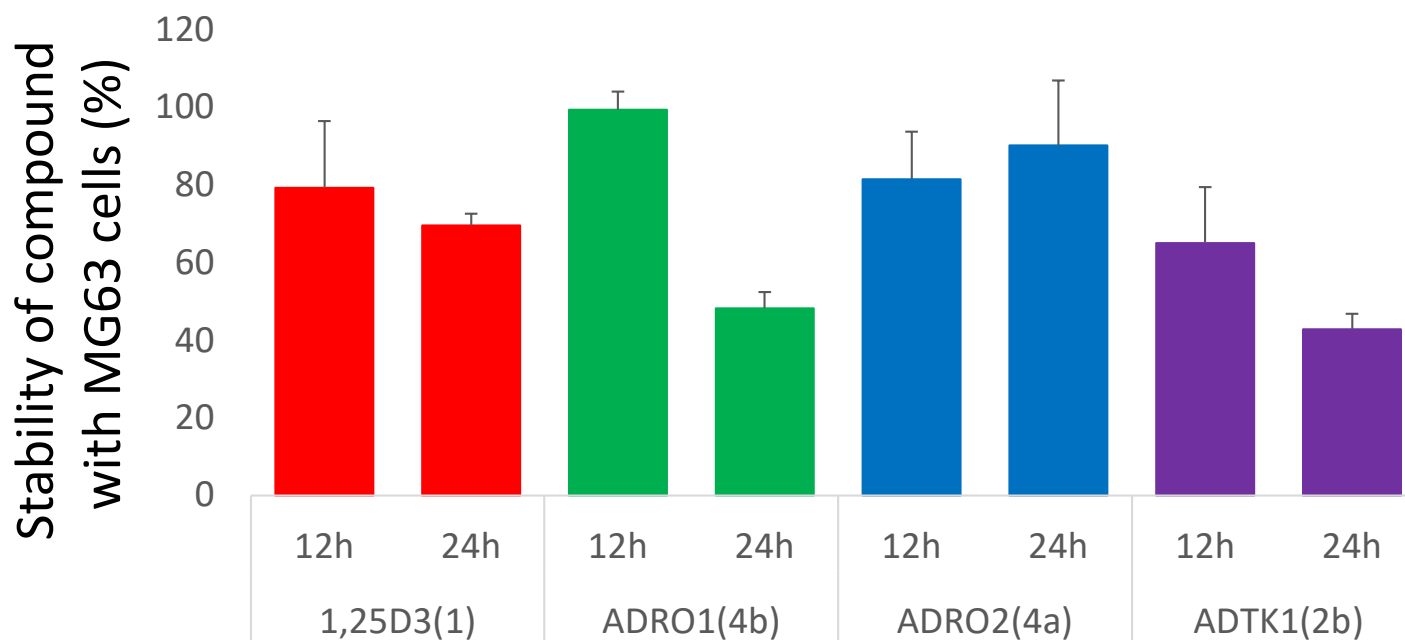

Figure S1B. Stability of 1,25(OH)<sub>2</sub>D<sub>3</sub> (**1**), ADRO1 (**4b**), ADRO2(4a) and ADTK1 (**2b**) in MG63 cells. 1 $\mu$ M of 1,25(OH)<sub>2</sub>D<sub>3</sub> (**1**), ADRO1 (**4b**), ADRO2 (**4a**) and ADTK1 (**2b**) were incubated with MG63 cells or without cells for 12h or 24h. Cell culture conditions were the same as those described in Figure S1. The percentage was calculated using a ratio of a value with cells to a value without cells. Each experimental mixture was extracted with chloroform/methanol (3:1, v/v). The extract was analyzed by HPLC (conditions are the same as those described in Figure S1). All values represent the means and error bars are standard deviations derived from triplicate assays.

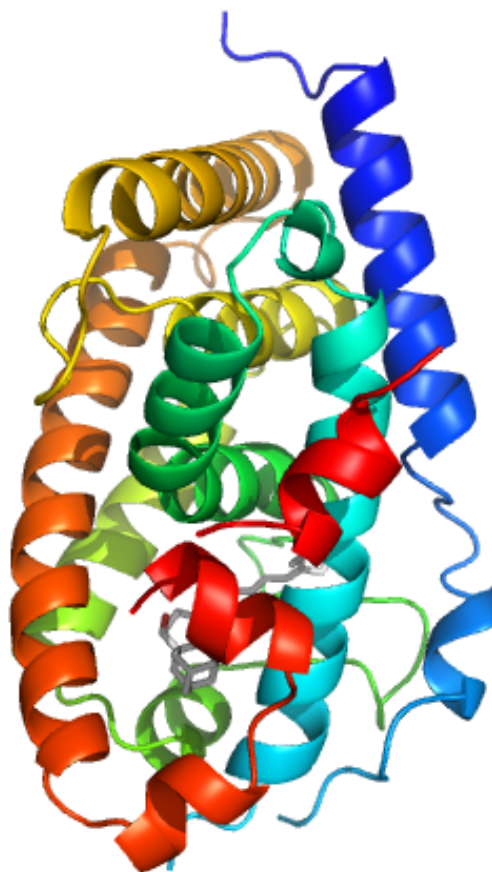

Figure S2. Overall crystal structures of ternary rVDR-LBD/25R-isomer (**4a**) /DRIP205 co-activator complex. The protein and peptide are drawn by ribbon structures with rainbow colors (blue to red). The ligand **4a** is shown in a stick model with atom-type colors.



Figure S3. Van der Waals interactions ( $<4 \text{ \AA}$ , magenta lines) of **4a** (atom-type colors with green carbon) with VDR residues (atom-type colors). Fifteen VDR residues are interacting with the ligand **4a**.

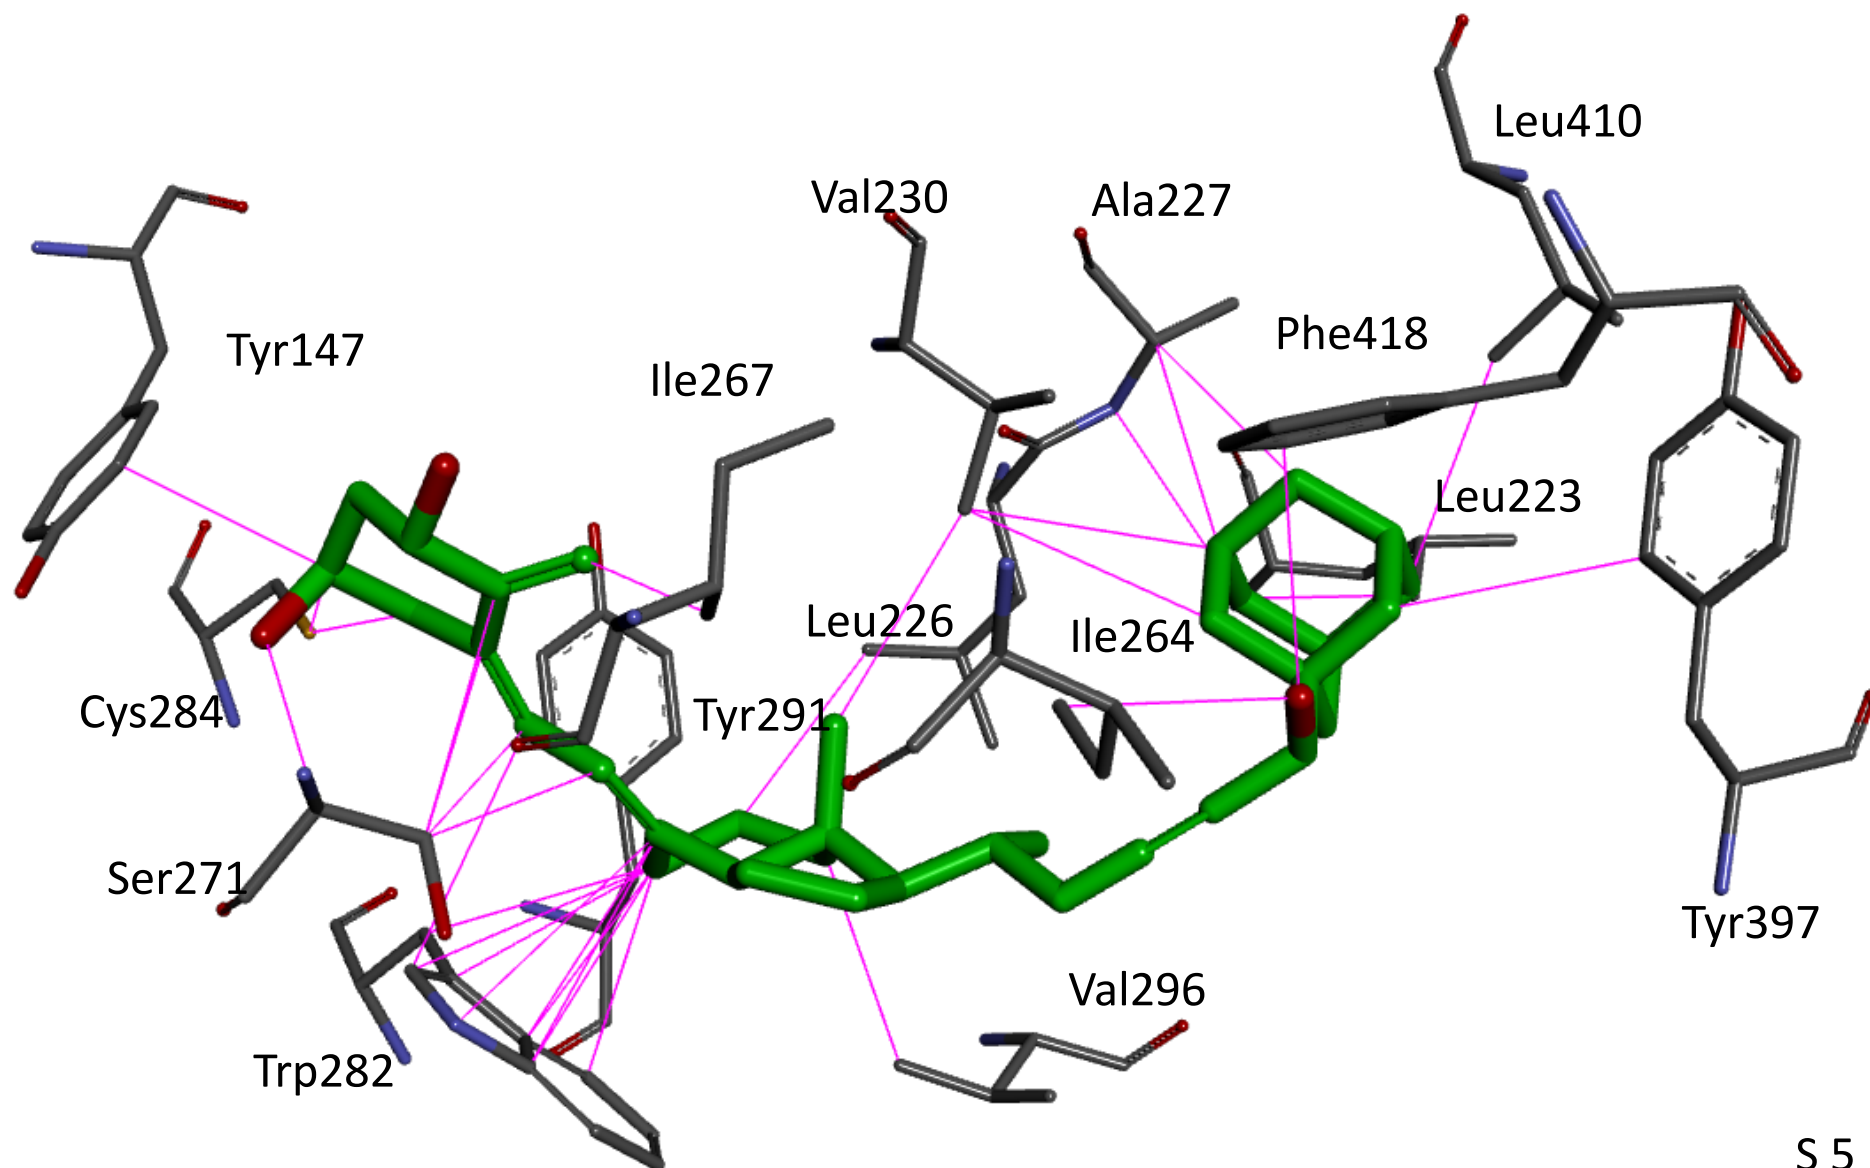

Figure S4. Electron density maps at the helix 11 region of VDR/ligand complexes. (A) 1,25(OH)<sub>2</sub>D<sub>3</sub> (**1**) complex. (B) 25*S*-Adamantylvitamin D (**4b**) complex. (C) 25*R*-Adamantylvitamin D (**4a**) complex.

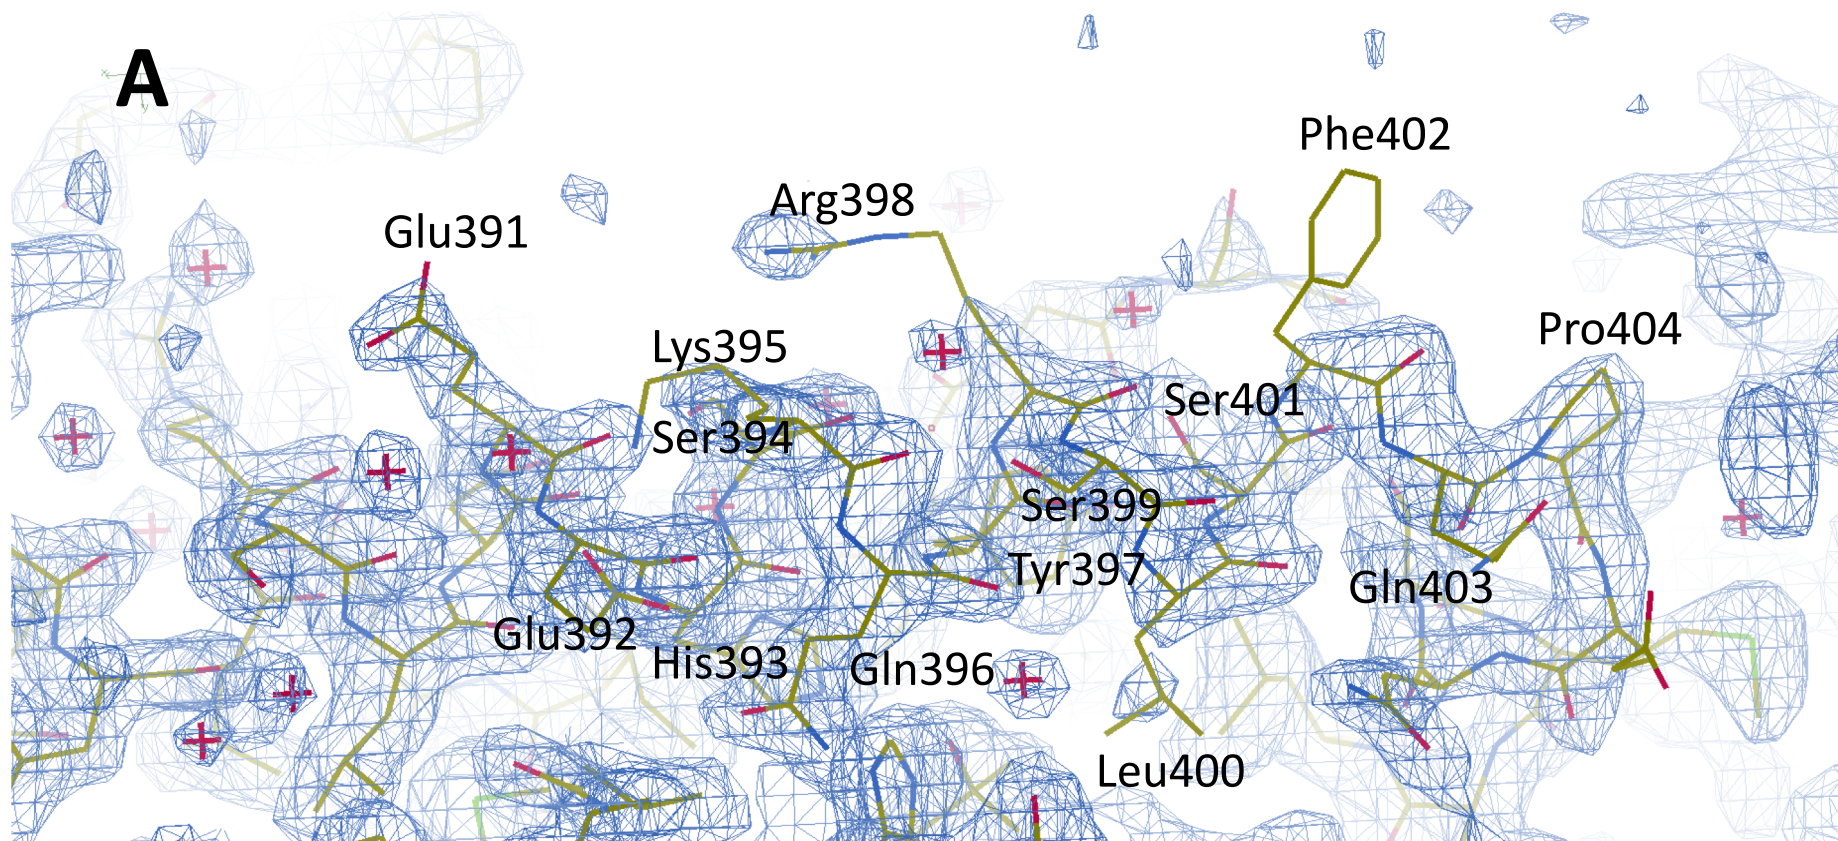

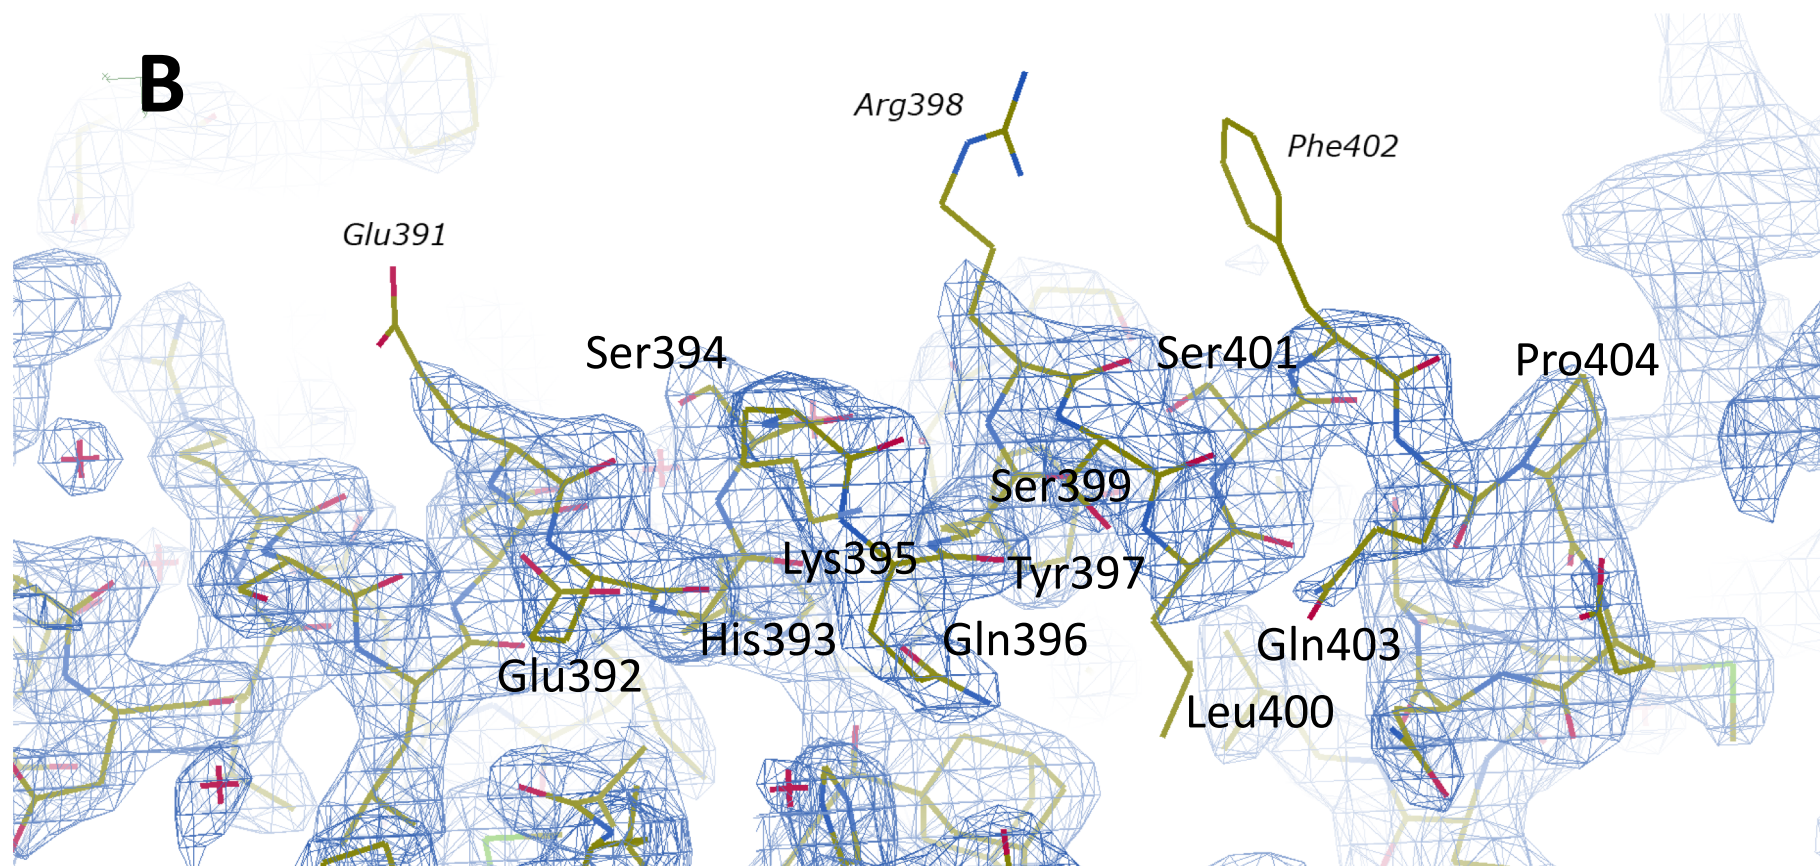



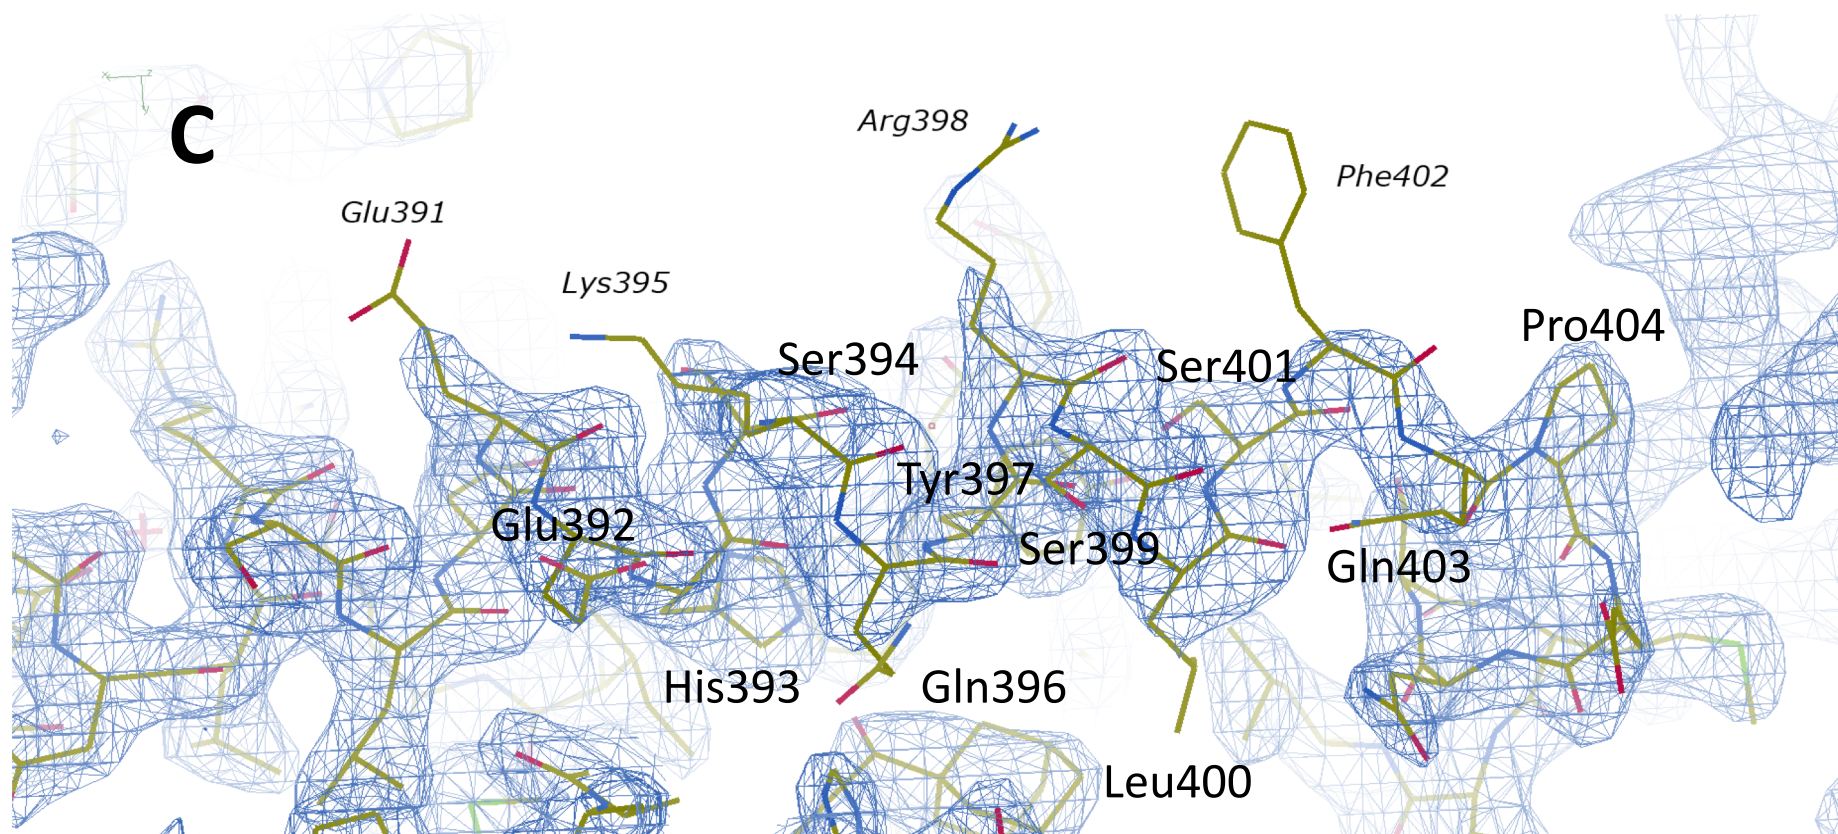

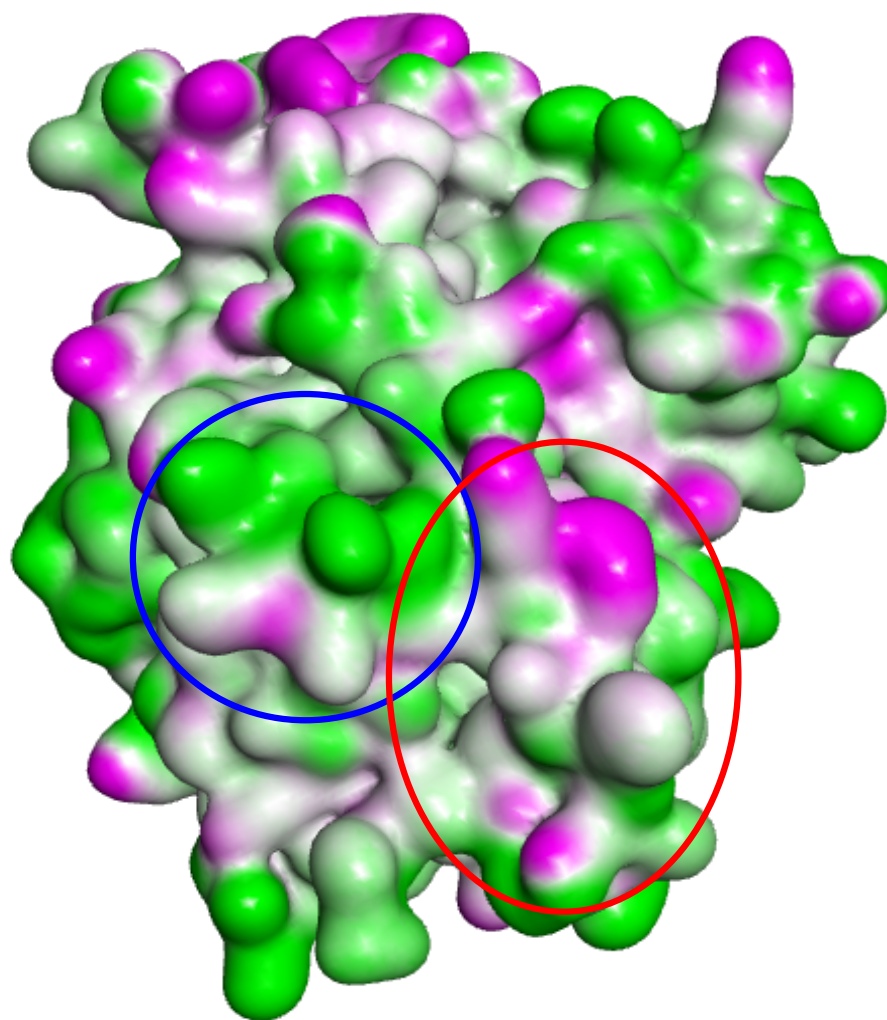

Figure S5. Surface structure of VDR-LBD/19-nor-2-methylene vitamin D derivative (**2b**) complex with hydrogen-bond donor (green)/acceptor (magenta) colors. Helix 11 and 7 regions are circled in red and blue, respectively.

**Table S1. Data Collection and Refinement Statistics**

\*Values in parentheses are for highest-resolution shell.

|                                       | 4a                  | 4b                  |
|---------------------------------------|---------------------|---------------------|
| Data collection                       |                     |                     |
| Spacegroup                            | C2                  | C2                  |
| Cell dimensions                       |                     |                     |
| a, b, c (Å)                           | 153.7, 41.8, 42.0   | 154.1, 41.1, 41.4   |
| b (deg)                               | 95.6                | 96.4                |
| Resolution (Å)                        | 50-1.99 (2.07-1.99) | 50-2.10 (2.22-2.10) |
| R <sub>sym</sub>                      | 0.078 (0.607)       | 0.079 (0.427)       |
| Completeness (%)                      | 98.6 (95.7)         | 99.1 (99.0)         |
| Redundancy                            | 3.2 (3.2)           | 3.3 (3.3)           |
| Average I/σ(I)                        | 7.5 (1.4)           | 9.6 (3.3)           |
| Refinement                            |                     |                     |
| Resolution (Å)                        | 50-2.0              | 50-2.1              |
| No of reflections                     | 17148               | 14429               |
| R <sub>work</sub> / R <sub>free</sub> | 0.194/0.243         | 0.161/0.214         |
| No of atoms                           |                     |                     |
| protein atoms                         | 2004                | 1984                |
| ligand atoms                          | 38                  | 38                  |
| solvent atoms                         | 12                  | 54                  |
| RMS deviations                        |                     |                     |
| bond length (Å)                       | 0.016               | 0.016               |
| bond angles (deg)                     | 1.90                | 1.83                |
| Average B-factor (Å <sup>2</sup> )    | 50.6                | 43.5                |
| PDB entry ID                          | 5XZH                | 5XZF                |

The  $^1\text{H}$  and  $^{13}\text{C}$  NMR spectra of compounds **4a**, **4b**, **5a**, **5b**, **6**, **8**, **13**, **14**, **15**, **16**, **17**, and **18**.

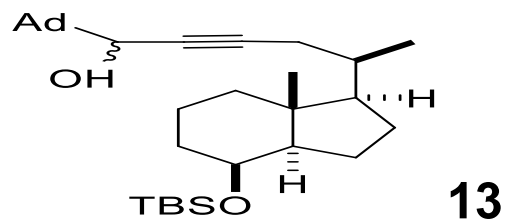

$^1\text{H}$  NMR ( $\text{CDCl}_3$ , 250 MHz)

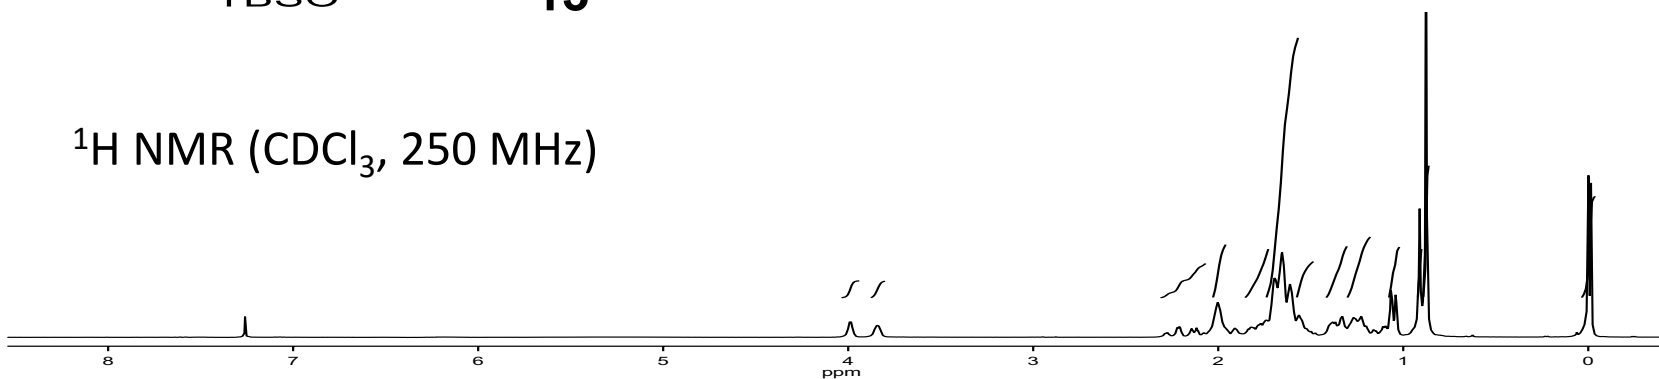

$^{13}\text{C}$  NMR ( $\text{CDCl}_3$ , 63 MHz)

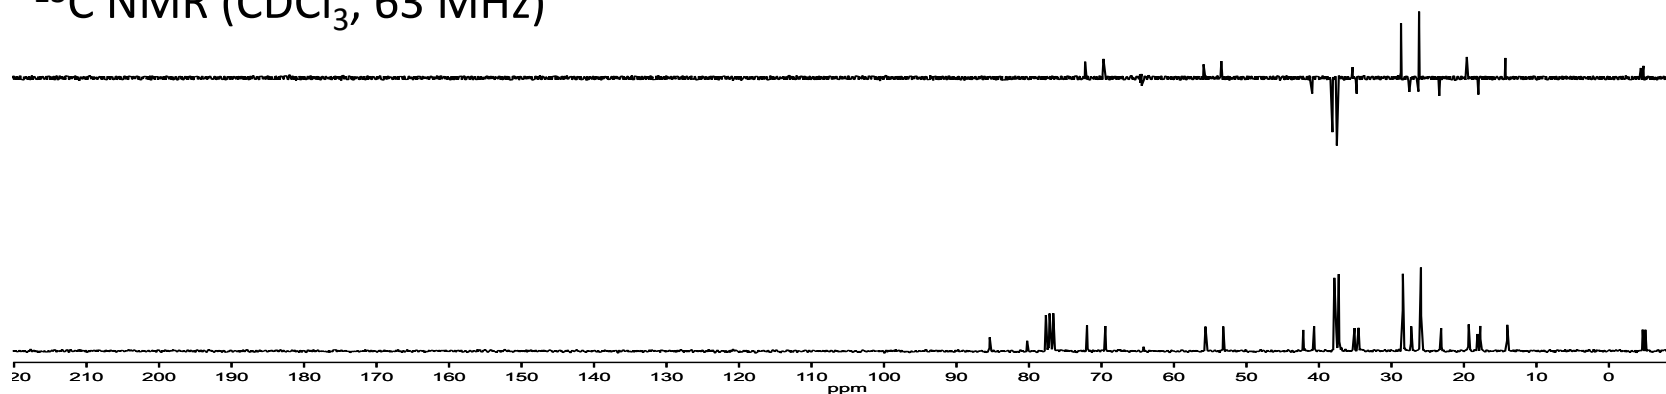

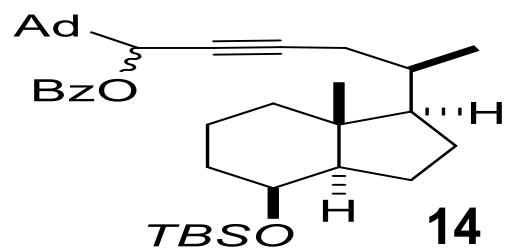

$^1\text{H}$  NMR ( $\text{CDCl}_3$ , 250 MHz)

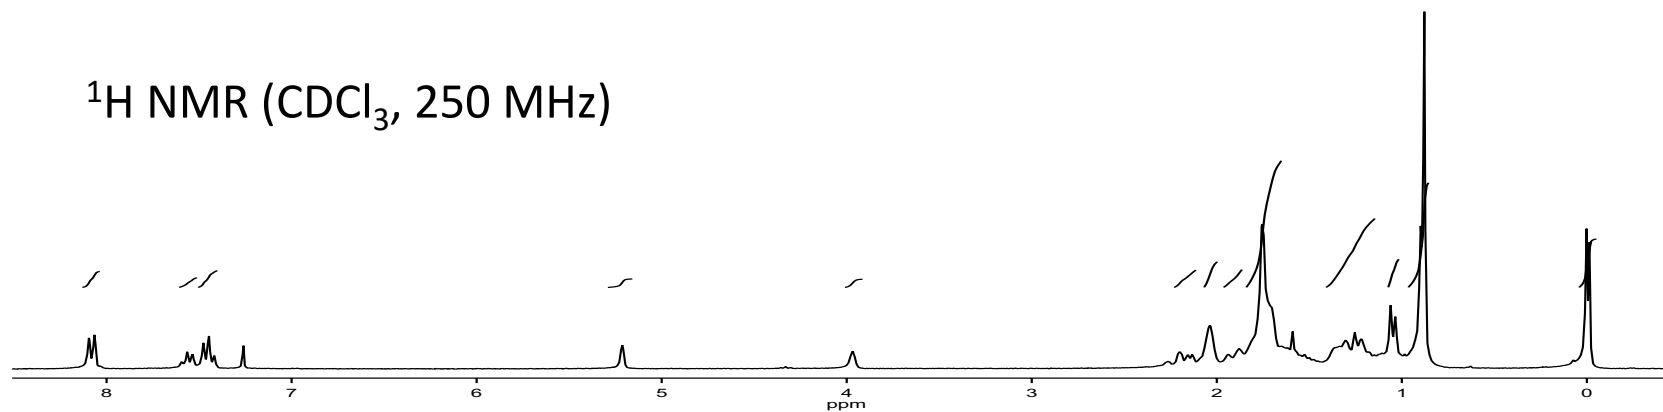

$^{13}\text{C}$  NMR ( $\text{CDCl}_3$ , 63 MHz)

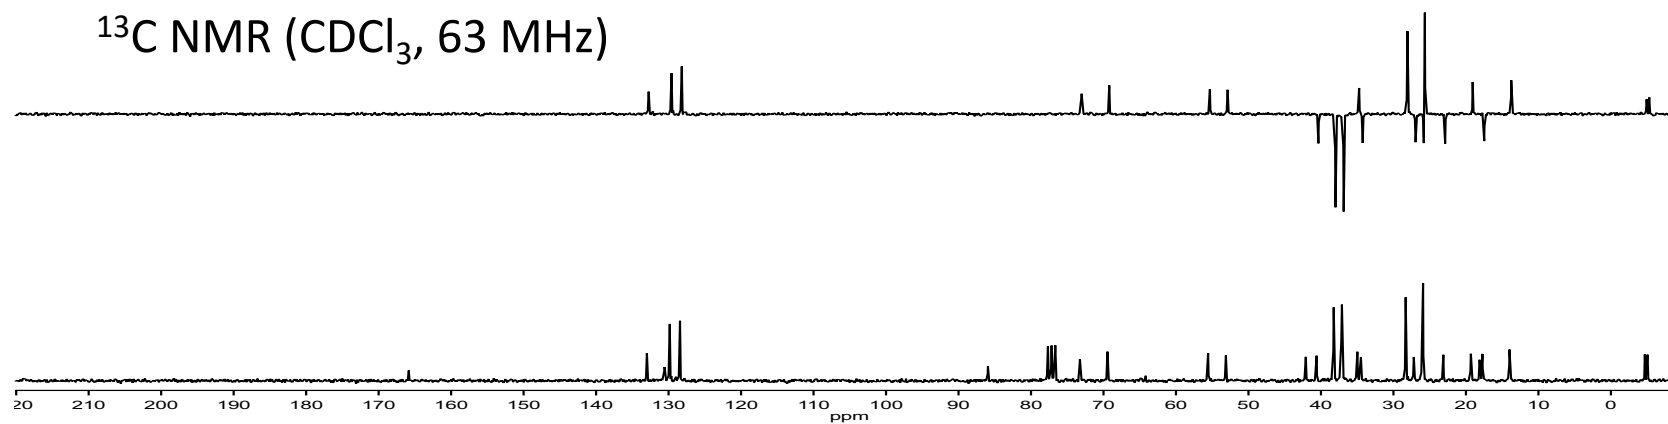



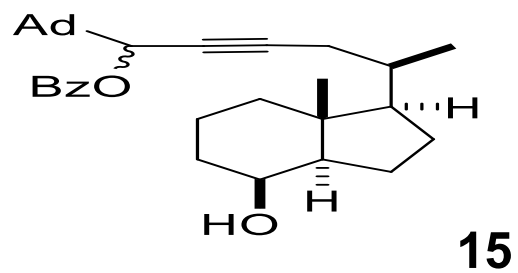

$^1\text{H}$  NMR ( $\text{CDCl}_3$ , 250 MHz)

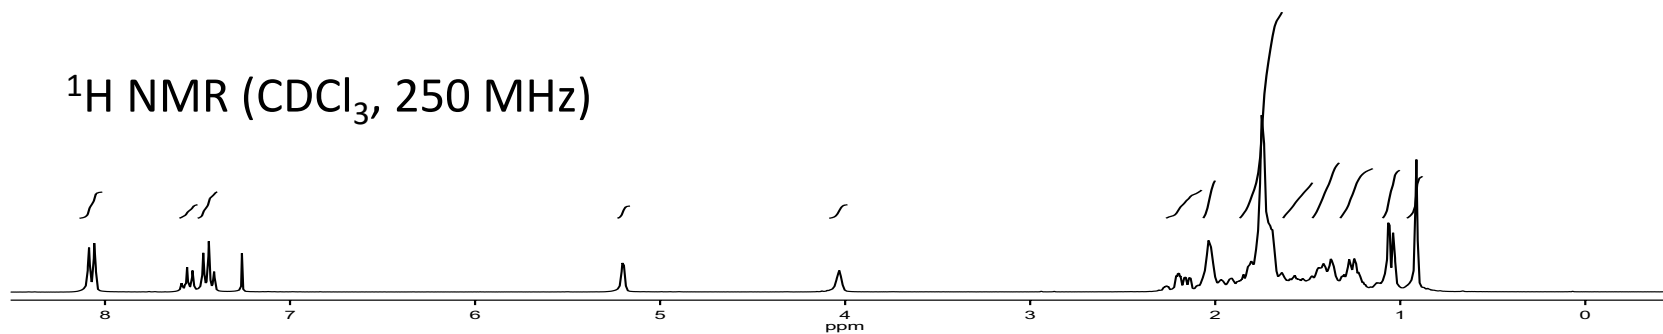

$^{13}\text{C}$  NMR ( $\text{CDCl}_3$ , 63 MHz)

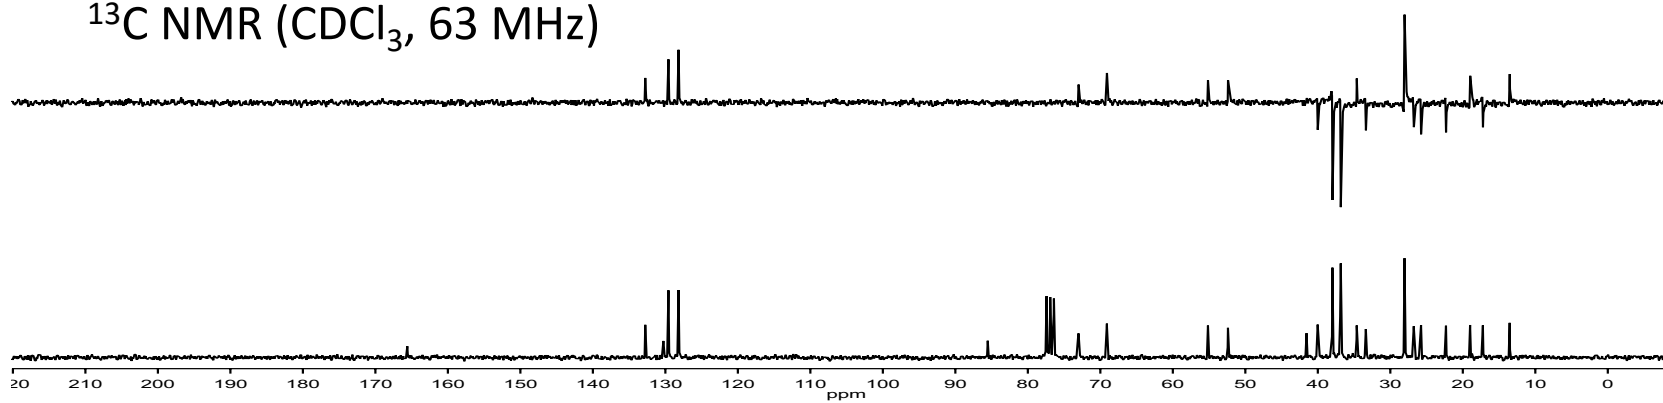

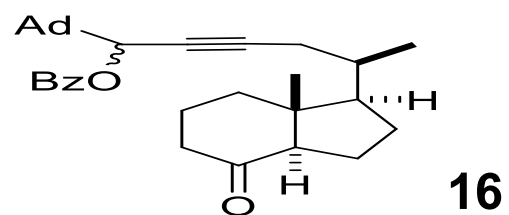

$^1\text{H}$  NMR ( $\text{CDCl}_3$ , 250 MHz)

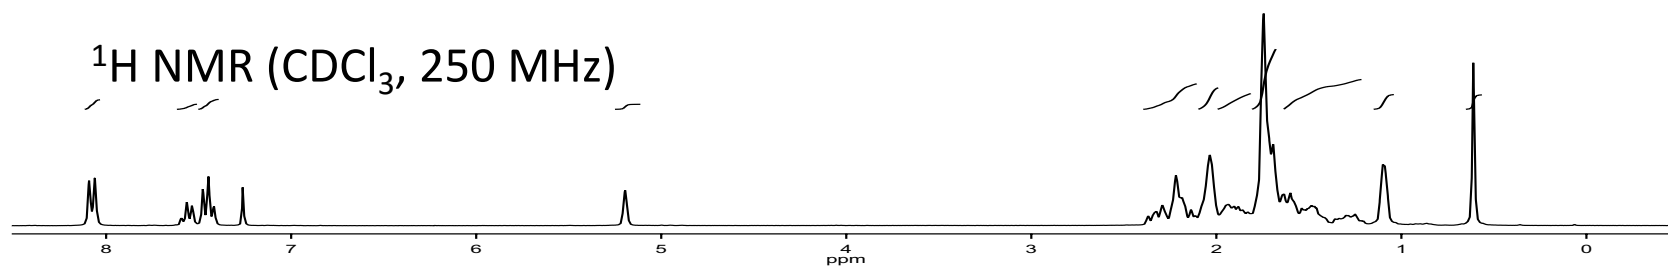

$^{13}\text{C}$  NMR ( $\text{CDCl}_3$ , 63 MHz)

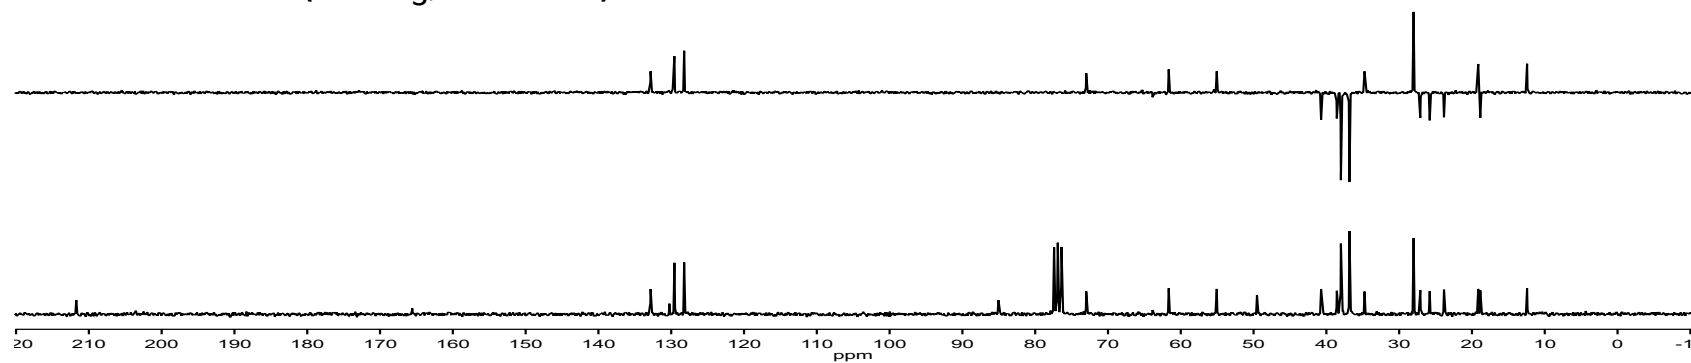

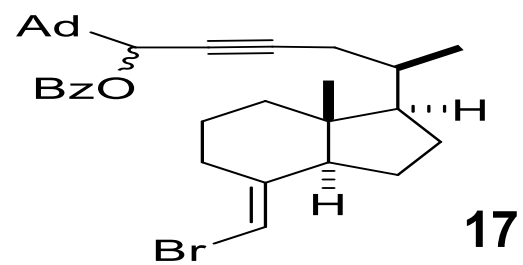

$^1\text{H}$  NMR ( $\text{CDCl}_3$ , 250 MHz)

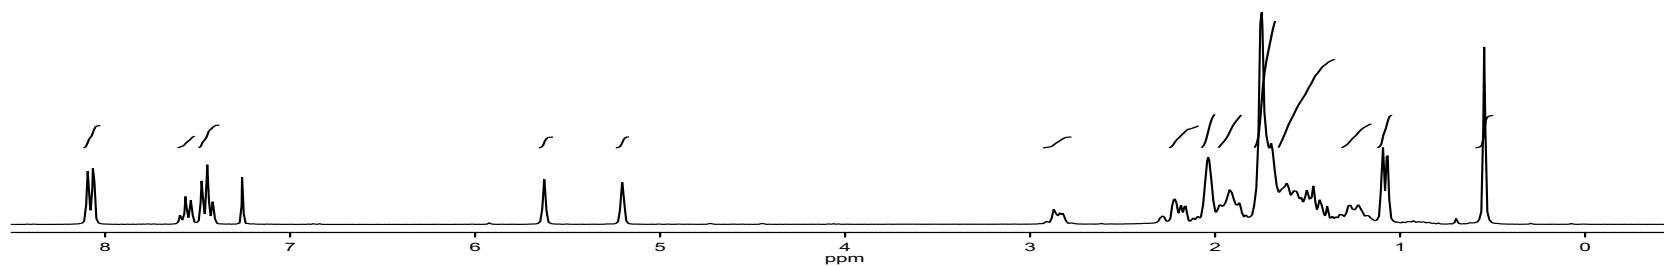

$^{13}\text{C}$  NMR ( $\text{CDCl}_3$ , 63 MHz)

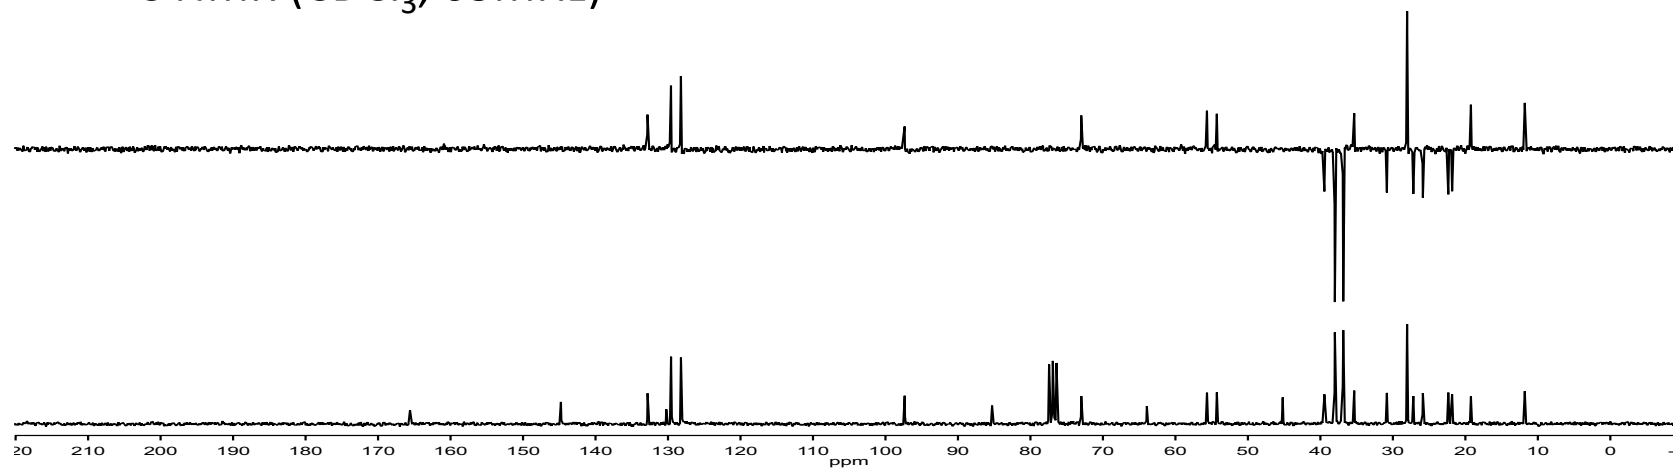

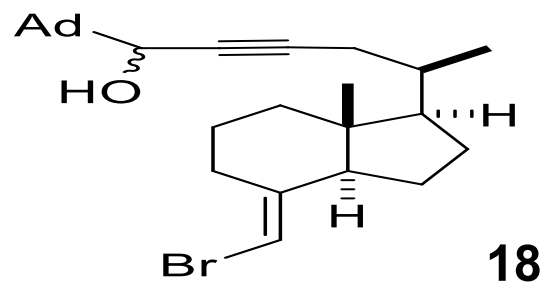

$^1\text{H}$  NMR ( $\text{CDCl}_3$ , 250 MHz)

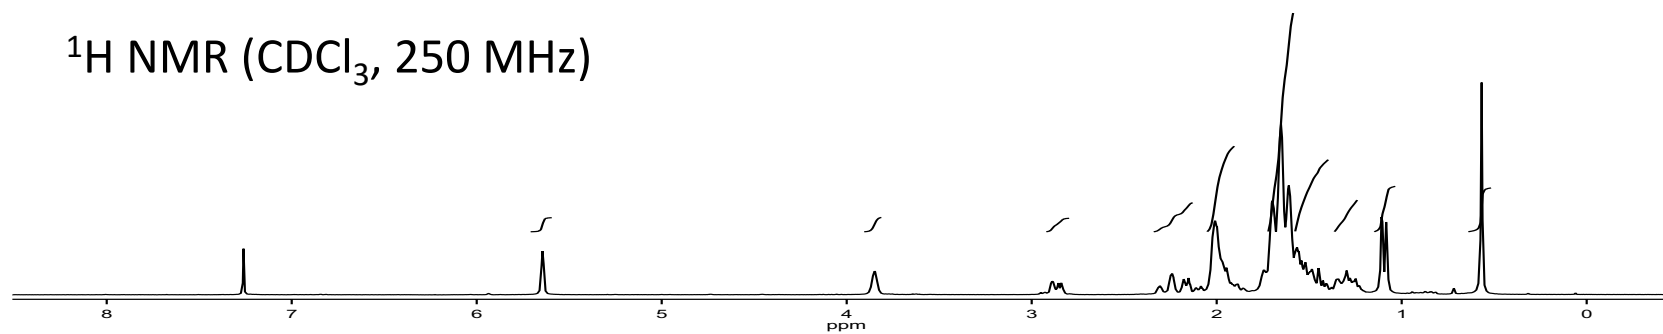

$^{13}\text{C}$  NMR ( $\text{CDCl}_3$ , 63 MHz)

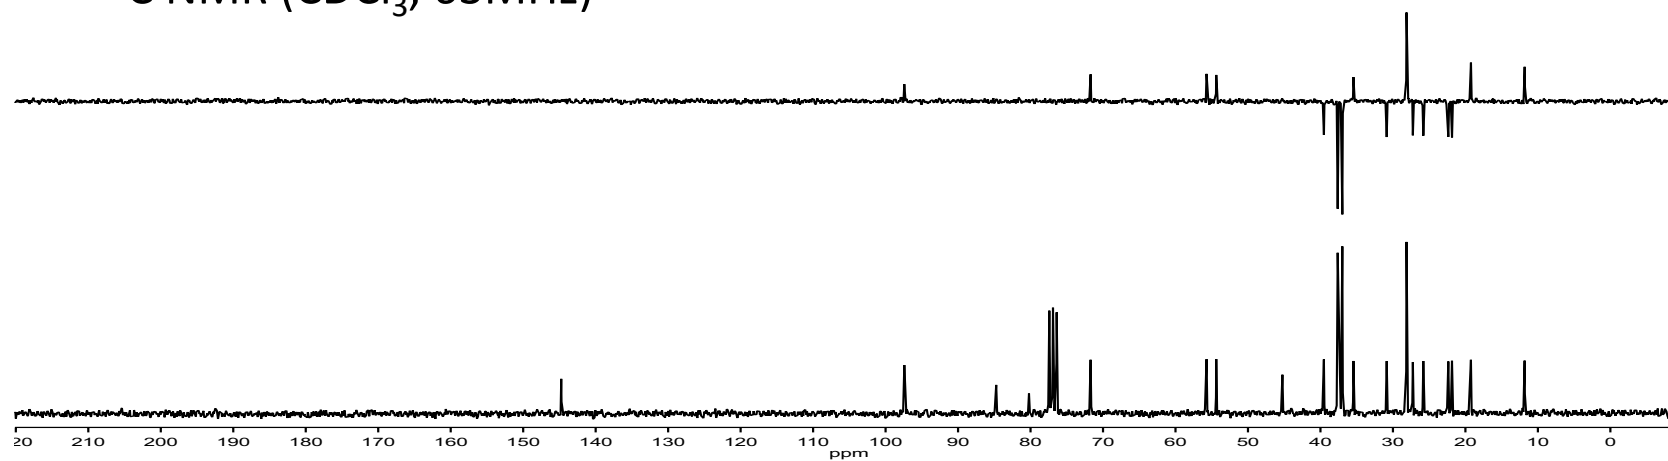

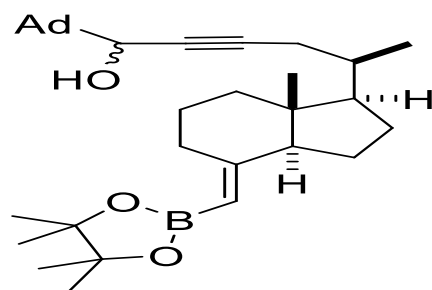

**8**

$^1\text{H}$  NMR ( $\text{CDCl}_3$ , 250 MHz)

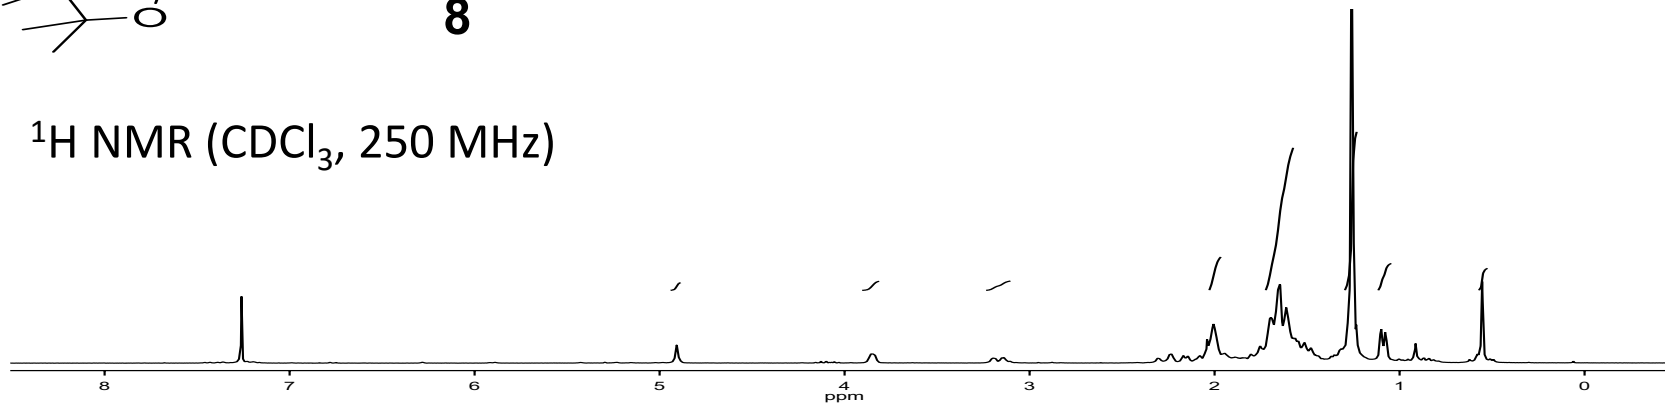

$^{13}\text{C}$  NMR ( $\text{CDCl}_3$ , 63MHz)

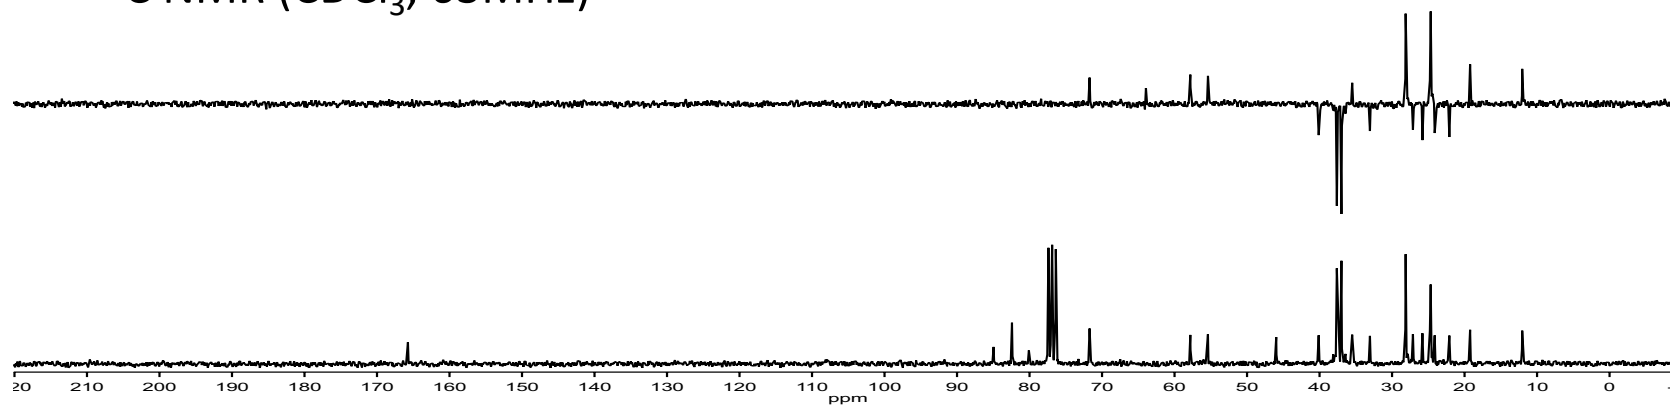

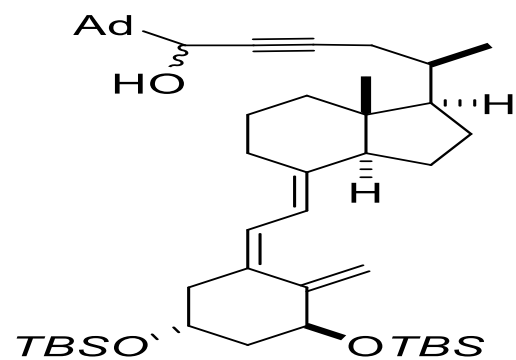

**6**

$^1\text{H}$  NMR ( $\text{CDCl}_3$ , 250 MHz)

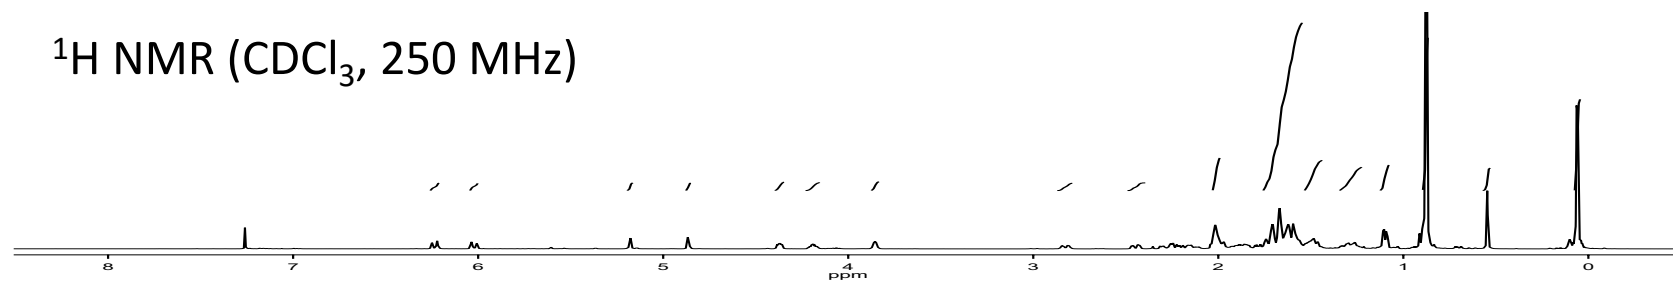

$^{13}\text{C}$  NMR ( $\text{CDCl}_3$ , 63 MHz)

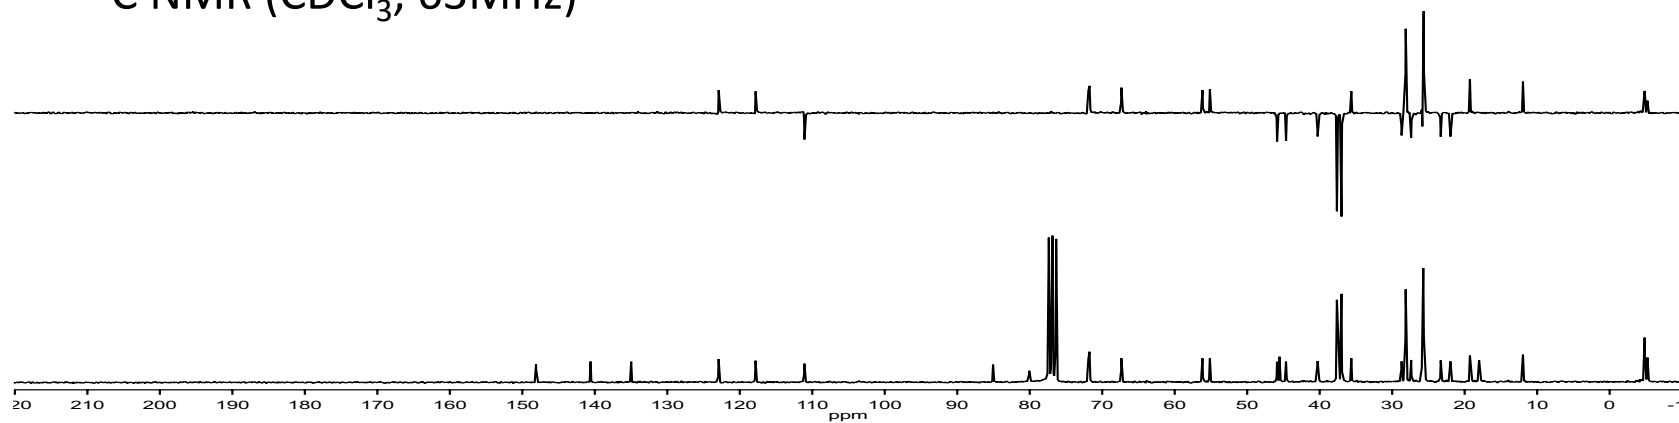

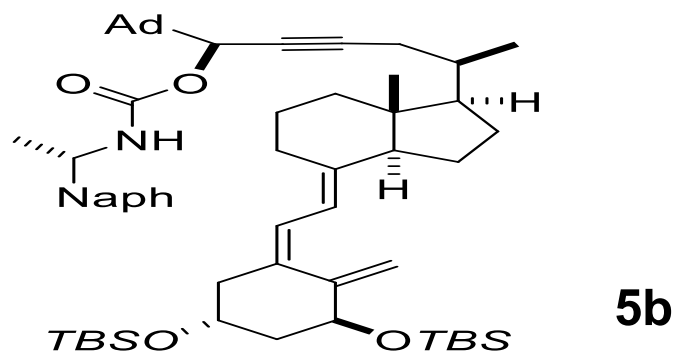

$^1\text{H}$  NMR ( $\text{CDCl}_3$ , 250 MHz)

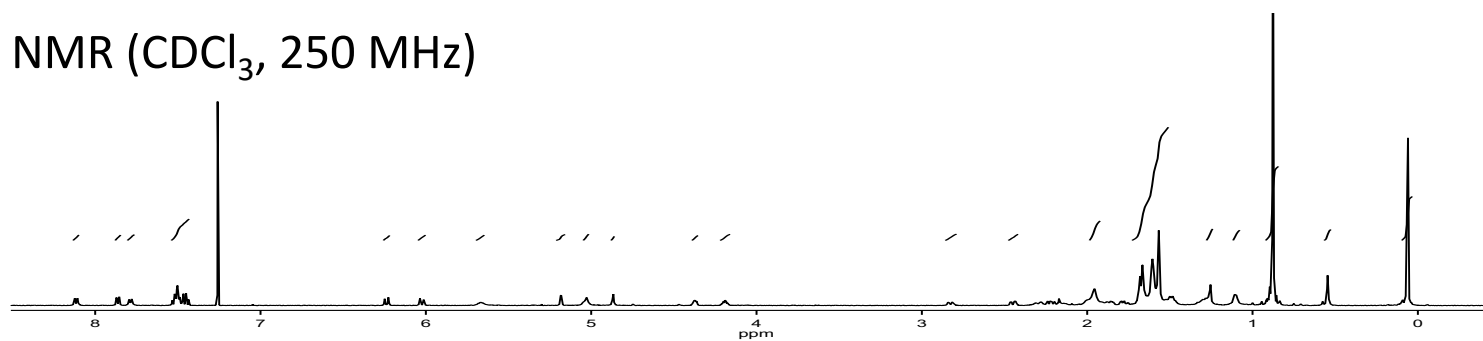

$^{13}\text{C}$  NMR ( $\text{CDCl}_3$ , 63 MHz)

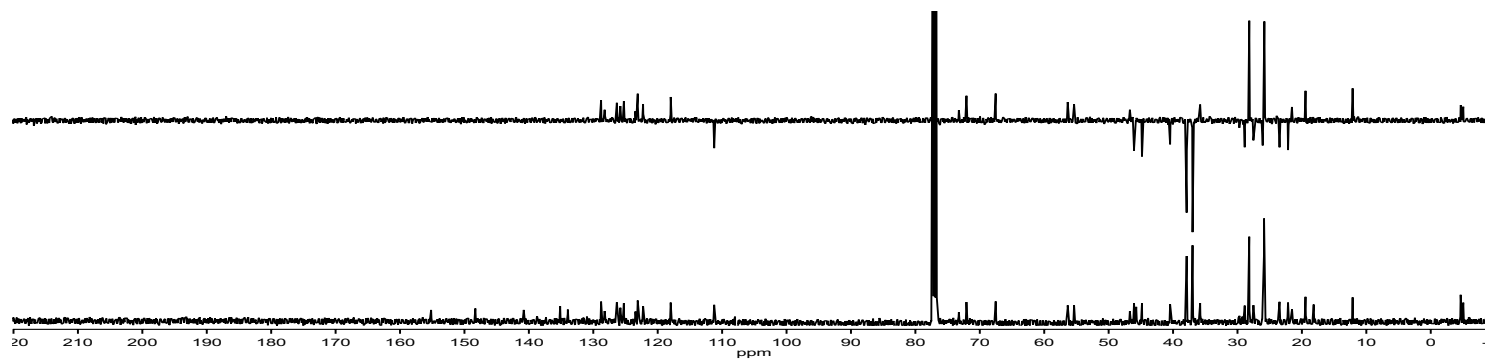

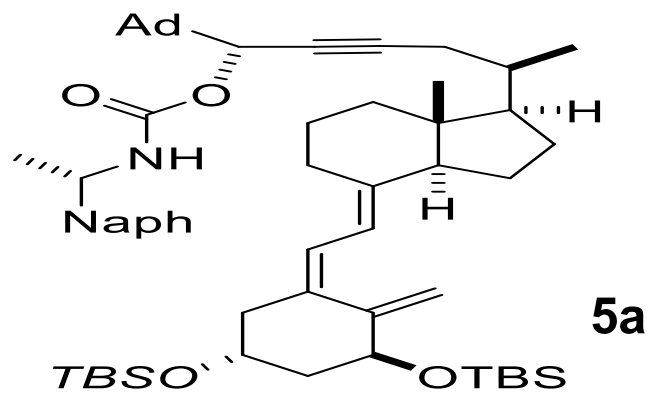

$^1\text{H}$  NMR ( $\text{CDCl}_3$ , 250 MHz)

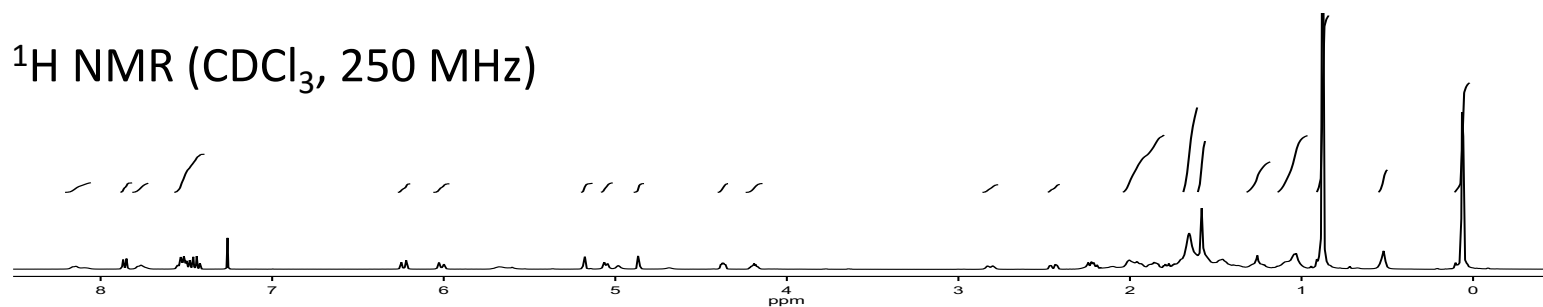

$^{13}\text{C}$  NMR ( $\text{CDCl}_3$ , 63 MHz)

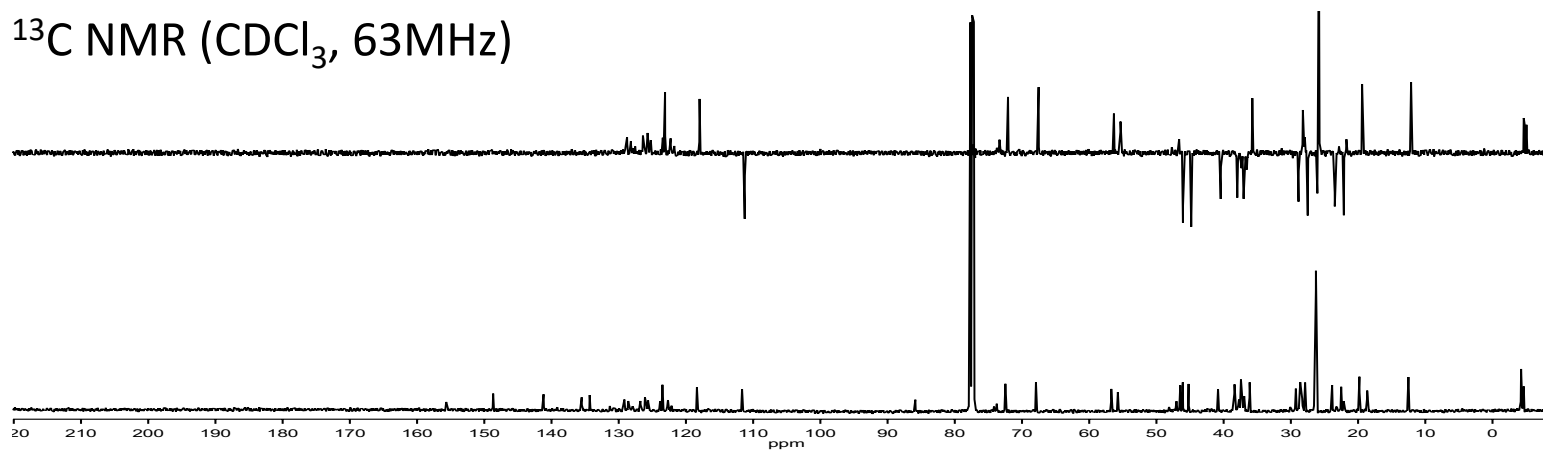



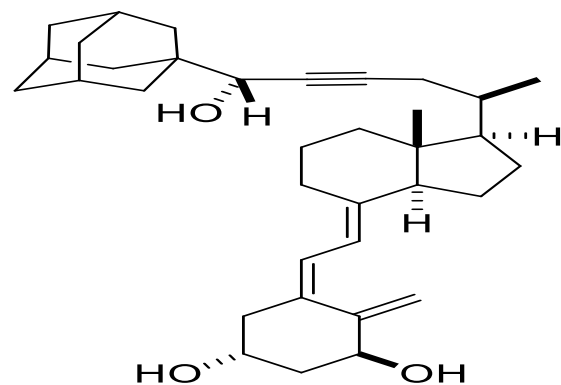

**4a**

$^1\text{H}$  NMR ( $\text{CDCl}_3$ , 250 MHz)

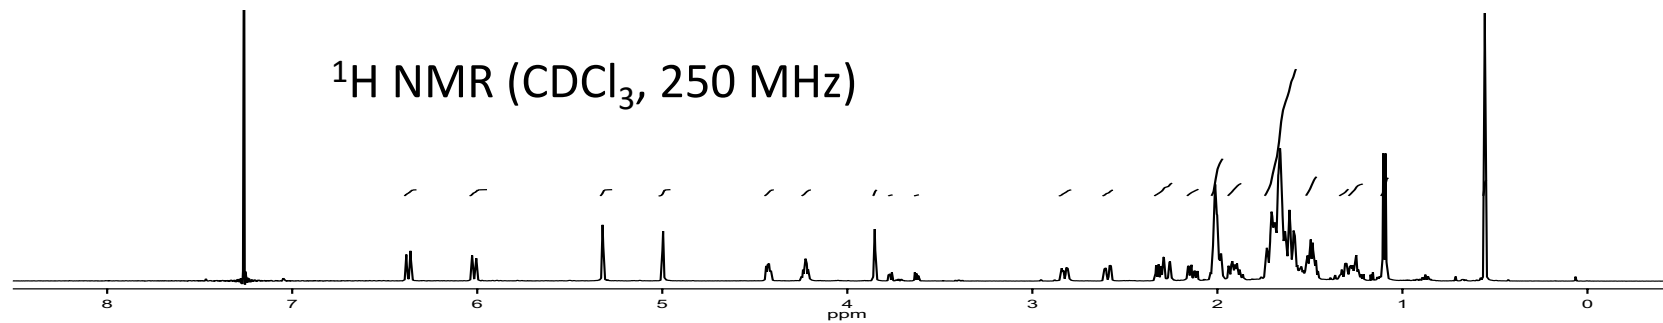

$^{13}\text{C}$  NMR ( $\text{CDCl}_3$ , 63 MHz)

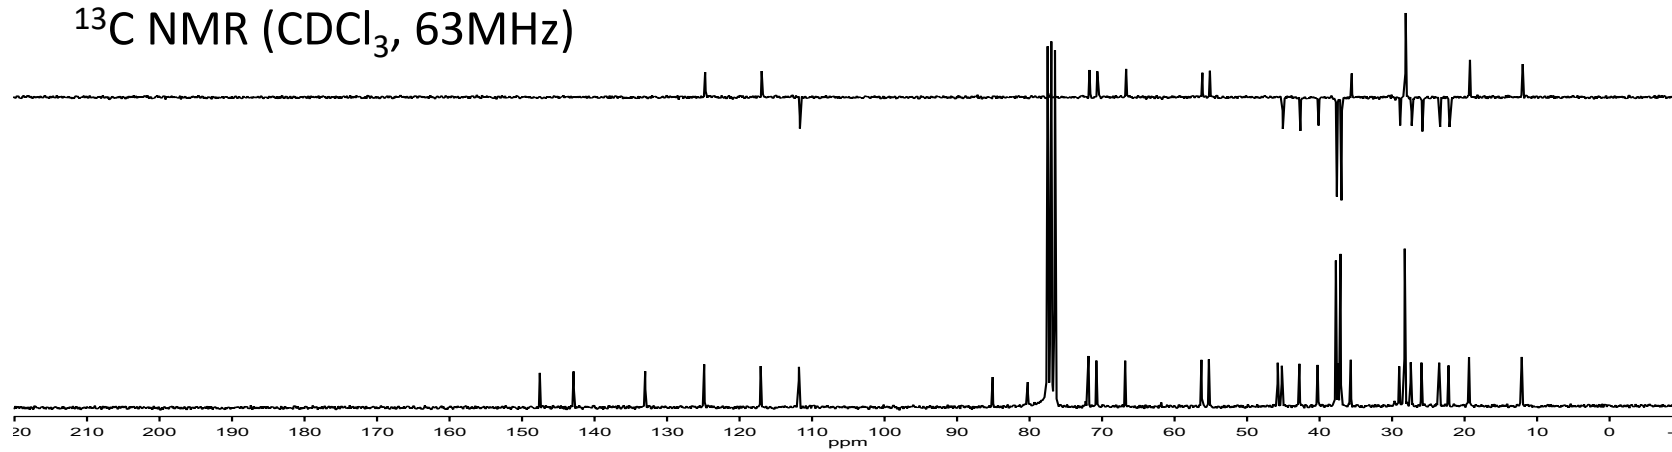

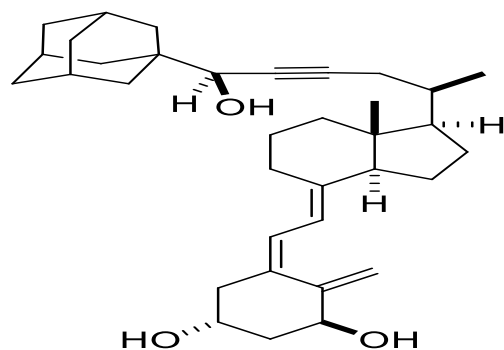

**4b**

$^1\text{H}$  NMR ( $\text{CDCl}_3$ , 250 MHz)

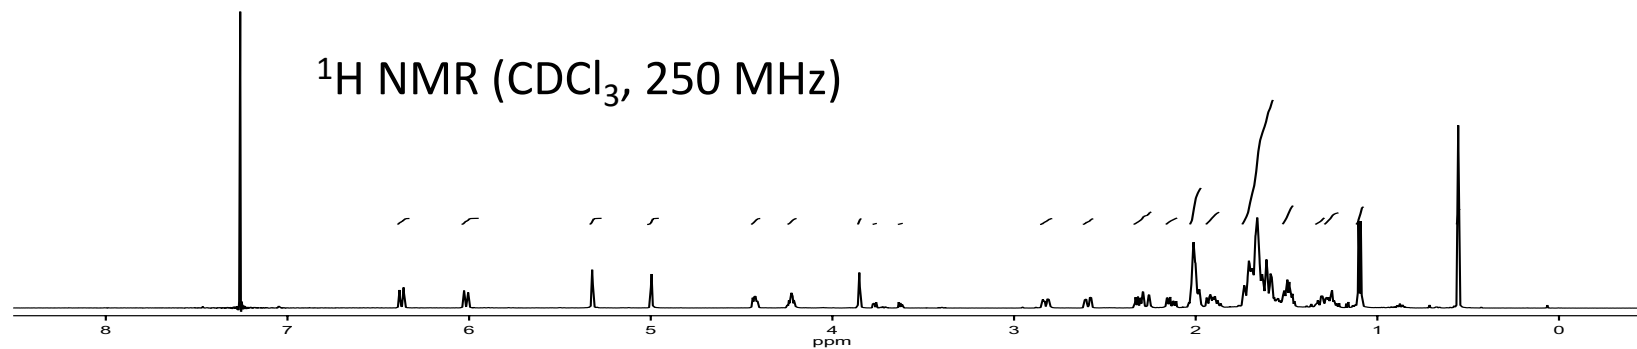

$^{13}\text{C}$  NMR ( $\text{CDCl}_3$ , 63MHz)

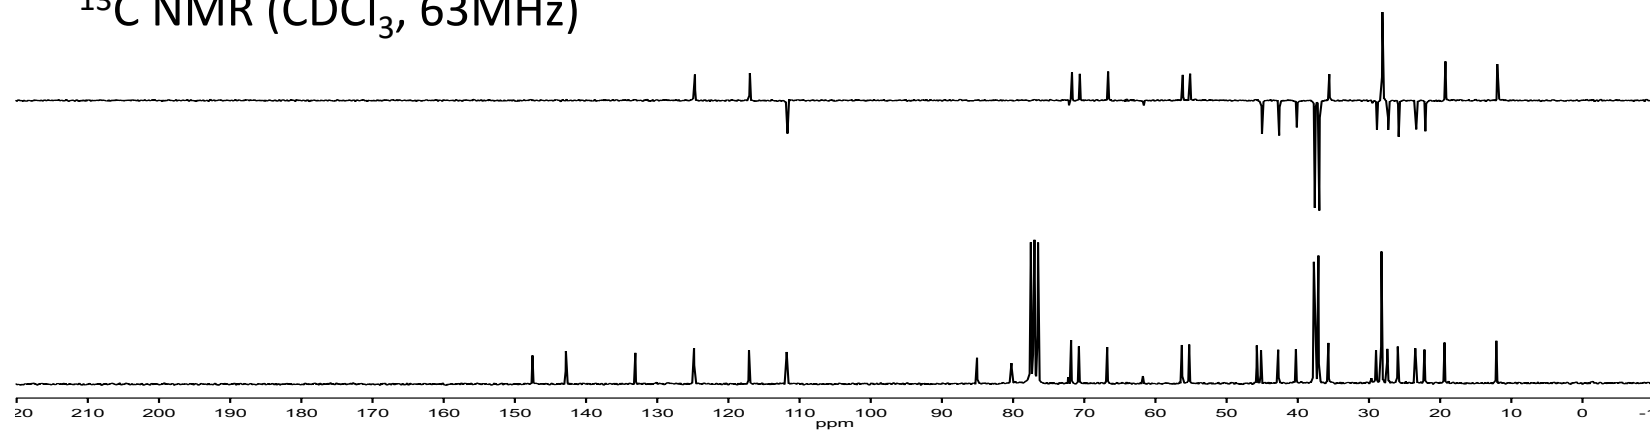

Supplement: Supplementary file 1 [file 12467990]
